# Supplementary material for: Emerging Bordetella pertussis Strains Induce Enhanced Signaling of Human Pattern Recognition Receptors TLR2, NOD2 and Secretion of IL-10 by Dendritic Cells
Source: PubMed Central journal article supplement (PMC5226795; doi:10.1371/journal.pone.0170027), 2017-01-11
Supplement: pone.0170027.s004.pdf [file pone.0170027.s004.pdf]

| Strain       | Group          | Isolation period (years)                 | SEAP activity (OD) |                    |                    |
|--------------|----------------|------------------------------------------|--------------------|--------------------|--------------------|
|              |                |                                          | TLR2               | TLR4               | NOD2               |
| B0558        | Introd-<br>Vac | 1950-60                                  | 1.55               | 0.47               | 0.57               |
| <b>B0304</b> |                | 1950-60                                  | 1.75               | 0.36               | 0.52               |
| <b>B0571</b> |                | 1950-60                                  | 1.57               | 0.50               | 0.41               |
| B1203        |                | 1950-60                                  | 1.85               | 0.62               | 0.55               |
| <b>B1381</b> |                | 1950-60                                  | 1.50               | 0.43               | 0.54               |
| B1198        |                | 1950-60                                  | 1.34               | 0.49               | 0.56               |
| <b>B0569</b> |                | 1950-60                                  | 1.12               | 0.48               | 0.40               |
| <b>B1378</b> |                | 1950-60                                  | 1.37               | 0.43               | 0.54               |
| <b>B1384</b> |                | 1950-60                                  | 1.45               | 0.42               | 0.55               |
|              |                | <b>Avg (Avg OD<sub>allstrains</sub>)</b> | <b>1.50 (1.51)</b> | <b>0.47 (0.51)</b> | <b>0.51 (0.51)</b> |
| B0440        | WCV            | 1970-2000                                | 1.70               | 0.56               | 0.44               |
| B2939        |                | 1970-2000                                | 1.58               | 0.47               | 0.51               |
| B2965        |                | 1970-2000                                | 1.54               | 0.59               | 0.46               |
| B0354        |                | 1970-2000                                | 1.94               | 0.54               | 0.53               |
| B0599        |                | 1970-2000                                | 1.68               | 0.47               | 0.63               |
| B0541        |                | 1970-2000                                | 1.63               | 0.52               | 0.60               |
| B0606        |                | 1970-2000                                | 1.76               | 0.56               | 0.42               |
| B1960        |                | 1970-2000                                | 1.89               | 0.74               | 0.38               |
| B1895        |                | 1970-2000                                | 1.58               | 0.53               | 0.55               |
| B1917        |                | 1970-2000                                | 1.46               | 0.56               | 0.51               |
|              |                | <b>Avg (Avg OD<sub>allstrains</sub>)</b> | <b>1.67 (1.71)</b> | <b>0.55 (0.54)</b> | <b>0.50 (0.57)</b> |
| <b>B3212</b> | ACV            | 2005-nu                                  | 1.73               | 0.39               | 0.36               |
| <b>B2914</b> |                | 2005-nu                                  | 1.84               | 0.64               | 0.72               |
| B3115        |                | 2005-nu                                  | 1.78               | 0.61               | 0.74               |
| <b>B3135</b> |                | 2005-nu                                  | 1.83               | 0.55               | 0.56               |
| <b>B3446</b> |                | 2005-nu                                  | 1.65               | 0.69               | 0.37               |
| <b>B3896</b> |                | 2005-nu                                  | 1.79               | 0.57               | 0.55               |
| <b>B3962</b> |                | 2005-nu                                  | 1.96               | 0.48               | 0.53               |
| B4171        |                | 2005-nu                                  | 1.72               | 0.48               | 0.54               |
| B3235        |                | 2005-nu                                  | 1.56               | 0.54               | 0.54               |
| B3400        |                | 2005-nu                                  | 1.55               | 0.59               | 0.50               |
|              |                | <b>Avg (Avg OD<sub>allstrains</sub>)</b> | <b>1.74 (1.71)</b> | <b>0.55(0.54)</b>  | <b>0.54 (0.57)</b> |
